# Supplementary material for: Humic acid as an efficient and reusable catalyst for one pot three-component green synthesis of 5-substituted 1H-tetrazoles in water
Source: Royal Society of Chemistry journal article supplement (doi:10.1039/c9ra08523h), 2020-01-01

## Supporting Information

### Humic acid as an efficient and reusable catalyst for one pot three-component green synthesis of 5-substituted 1*H*-tetrazoles in water

Hongshe Wang,<sup>a</sup> Yichun Wang,<sup>b</sup> Yinfeng Han,<sup>a</sup> Weixing Zhao<sup>a</sup> and Xiaomei Wang<sup>a</sup>

<sup>a</sup>College of Chemistry and Chemical Engineering, Baoji University of Arts and Sciences, Baoji 721013, China

<sup>b</sup>College of Pharmacy, Shaanxi University of Chinese Medicine, Xiayang 712046, China

### Table of contents

Characterization data of compounds (**2a-w**)

<sup>1</sup>H and <sup>13</sup>C NMR Spectra of all compounds (**2a-w**)

### Characterization data of compounds (2a-w)

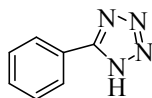

5-phenyl-1*H*-tetrazole (**2a**): white solid; MP: 215-216 °C (lit.<sup>[1]</sup> 215-217 °C); reaction time 4 h; <sup>1</sup>H NMR (400 MHz, DMSO-*d*<sub>6</sub>) δ 7.64-7.65 (3H, m), δ 8.07-8.10 (2H, m); <sup>13</sup>C NMR (100 MHz, DMSO-*d*<sub>6</sub>) δ 124.1, 126.9, 129.4, 131.2, 155.2. Anal. Calcd for C<sub>7</sub>H<sub>6</sub>N<sub>4</sub>: C, 57.53; H, 4.11; N, 38.36. Found: C, 57.32; H, 4.01; N, 38.58.

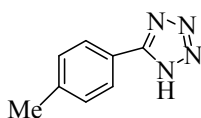

5-(4-methylphenyl)-1*H*-tetrazole (**2b**): white solid; MP: 248-249 °C (lit.<sup>[1]</sup> 247-249 °C); reaction time 4 h; <sup>1</sup>H-NMR (400 MHz, DMSO-*d*<sub>6</sub>) δ 2.37 (3H, s), 7.40 (2H, d, *J* = 8.2 Hz), 7.91 (2H, d, *J* = 8.2 Hz); <sup>13</sup>C NMR (100 MHz, DMSO-*d*<sub>6</sub>) δ 21.0, 121.2, 126.9, 129.9, 141.2, 155.1. Anal. Calcd for C<sub>8</sub>H<sub>8</sub>N<sub>4</sub>: C, 60.00; H, 5.00; N, 35.00. Found: C, 60.13; H, 5.11; N, 34.86.

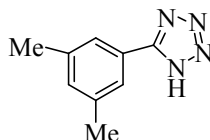

5-(3,5-dimethylphenyl)-1*H*-tetrazole (**2c**): white solid; MP: 204-206 °C (lit.<sup>[8]</sup> 205-207 °C); reaction time 4 h; <sup>1</sup>H NMR (400 MHz, DMSO-*d*<sub>6</sub>) δ 2.30 (6H, m), 7.35 (1H, s), 7.44 (2H, s); <sup>13</sup>C NMR (100 MHz, DMSO-*d*<sub>6</sub>) δ 20.9, 21.3, 111.6, 119.5, 129.9, 135.2, 139.5, 139.6. Anal. Calcd for C<sub>9</sub>H<sub>10</sub>N<sub>4</sub>: C, 62.07; H, 5.75; N, 32.18. Found: C, 62.31; H, 5.94; N, 32.01.

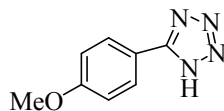

5-(4-methoxyphenyl)-1*H*-tetrazole (**2d**): white solid; MP: 231-232 °C (lit.<sup>[2]</sup> 230-231 °C); reaction time 5 h; <sup>1</sup>H NMR (400 MHz, DMSO-*d*<sub>6</sub>) δ 3.83 (3H, s), 7.15 (2H, d, *J* = 8.9 Hz), 7.97 (2H, d, *J* = 8.8 Hz); <sup>13</sup>C NMR (100 MHz, DMSO-*d*<sub>6</sub>) δ 55.4, 114.8, 116.4, 128.6, 154.8, 161.4. Anal. Calcd for C<sub>8</sub>H<sub>8</sub>N<sub>4</sub>O: C, 54.55; H, 4.55; N, 31.82. Found: C, 54.40; H, 4.69; N, 31.69.

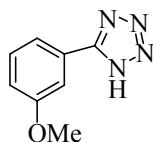

5-(3-methoxyphenyl)-1*H*-tetrazole (**2e**): white solid; MP: 158-159 °C (lit.<sup>[8]</sup> 157-158 °C); reaction time 5 h; <sup>1</sup>H NMR (400 MHz, DMSO-*d*<sub>6</sub>): δ 3.85 (3H, s), 7.18 (1H, s), 7.52 (1H, t, *J* = 8.0 Hz), 7.58-7.64 (2H, m); <sup>13</sup>C NMR (100 MHz, DMSO-*d*<sub>6</sub>) δ 55.4, 112.1, 116.9, 119.2, 125.4, 130.6, 155.3, 159.8. Anal. Calcd for C<sub>8</sub>H<sub>8</sub>N<sub>4</sub>O: C, 54.55; H, 4.55; N, 31.82. Found: C, 54.35; H, 4.72; N, 31.61.

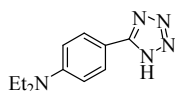

5-(4-*N,N*-diethylaminophenyl)-1*H*-tetrazole (**2f**): beige solid; MP: 89-90 °C (lit.<sup>[8]</sup> 90 °C); reaction time 6 h; <sup>1</sup>H NMR (400 MHz, DMSO-*d*<sub>6</sub>): δ 1.11 (6H, t, *J* = 7.0 Hz), 3.41 (4H, q, *J* = 7.0 Hz), 6.80-6.83 (2H, m), 7.80-7.85 (2H, m); <sup>13</sup>C NMR (100 MHz, DMSO-*d*<sub>6</sub>) δ 12.3, 43.7, 109.4, 111.2, 128.3, 149.3, 154.8. Anal. Calcd for C<sub>11</sub>H<sub>15</sub>N<sub>5</sub>: C, 60.83; H, 6.91; N, 32.26. Found: C, 60.64; H, 6.70; N, 32.49.

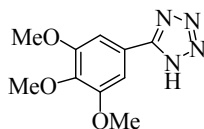

5-(3,4,5-trimethoxyphenyl)-1*H*-tetrazole (**2g**): white solid; MP: 201-202 °C (lit.<sup>[7]</sup> 201 °C); reaction time 6 h; <sup>1</sup>H NMR (400 MHz, DMSO-*d*<sub>6</sub>): δ 3.74 (3H, s), 3.88 (6H, s), 7.37 (2H, s); <sup>13</sup>C NMR (100 MHz, DMSO-*d*<sub>6</sub>) δ 55.7, 60.03, 102.8, 128.4, 136.5, 152.8, 160.5. Anal. Calcd for C<sub>10</sub>H<sub>12</sub>N<sub>4</sub>O<sub>3</sub>: C, 50.85; H, 5.08; N, 23.73. Found: C, 50.99; H, 5.29; N, 23.53.

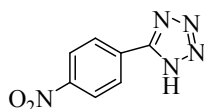

5-(4-nitrophenyl)-1*H*-tetrazole (**2h**): beige solid; MP: 215-216 °C (lit.<sup>[1]</sup> 214-216 °C); reaction time 3 h; <sup>1</sup>H NMR (400 MHz, DMSO-*d*<sub>6</sub>): δ 8.32 (2H, d, *J* = 8.4 Hz), 8.44 (2H, d, *J* = 8.4 Hz); <sup>13</sup>C NMR (100 MHz, DMSO-*d*<sub>6</sub>) δ 124.6, 128.2, 130.7, 148.7, 155.4. Anal. Calcd for C<sub>7</sub>H<sub>5</sub>N<sub>5</sub>O<sub>2</sub>: C, 43.98; H, 2.62; N, 36.65. Found: C, 43.84; H, 2.78; N, 36.51.

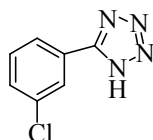

5-(3-chlorophenyl)-1*H*-tetrazole (**2i**): white solid; MP: 130-132 °C (lit.<sup>[3]</sup> 128-130 °C); reaction time 3 h; <sup>1</sup>H NMR (400 MHz, DMSO-*d*<sub>6</sub>): 7.64 (1H, bt, *J* = 7.5 Hz), 7.67 (1H, dd, *J* = 7.5 Hz, *J* = 2.0 Hz), 8.02 (1H, bdt, *J* = 6.8 Hz, *J* = 1.9 Hz), 8.08 (1H, bt, *J* = 1.9 Hz); <sup>13</sup>C NMR (100 MHz, DMSO-*d*<sub>6</sub>) δ 125.9, 126.5, 126.9, 131.3, 131.7, 134.5, 155.3. Anal. Calcd for C<sub>7</sub>H<sub>5</sub>ClN<sub>4</sub>: C, 46.54; H, 2.77; N, 31.02. Found: C, 46.49; H, 2.55; N, 31.27.

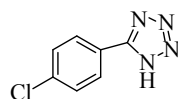

5-(4-chlorophenyl)-1*H*-tetrazole (**2j**): white solid; MP: 261-262 °C (lit.<sup>[1]</sup> 260-261 °C); reaction time 3 h; <sup>1</sup>H NMR (400 MHz, DMSO-*d*<sub>6</sub>): δ 7.70 (2H, d, *J* = 8.8 Hz), 8.08 (2H, d, *J* = 8.8 Hz); <sup>13</sup>C NMR (100 MHz, DMSO-*d*<sub>6</sub>) δ 123.2, 128.7, 129.5, 135.9, 154.8. Anal. Calcd for C<sub>7</sub>H<sub>5</sub>ClN<sub>4</sub>: C, 46.54; H, 2.77; N, 31.02. Found: C, 46.41; H, 2.63; N, 31.16.

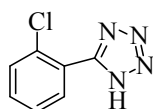

5-(2-chlorophenyl)-1*H*-tetrazole (**2k**): white solid; MP: 180-181 °C (lit.<sup>[3]</sup> 181-182 °C); reaction time 3 h; <sup>1</sup>H NMR (400 MHz, DMSO-*d*<sub>6</sub>): δ 7.56 (1H, ddd, *J* = 7.6 Hz, *J* = 7.2 Hz, *J* = 1.2 Hz), 7.63 (1H, ddd, *J* = 7.2 Hz, *J* = 8.0 Hz, *J* = 1.6 Hz), 7.71 (1H, dd, *J* = 8.0 Hz, *J* = 1.2 Hz), 7.82 (1H, dd, *J* = 7.6 Hz, *J* = 1.7 Hz); <sup>13</sup>C NMR (100 MHz, DMSO-*d*<sub>6</sub>) δ 124.1, 127.7, 130.4, 131.7, 131.9, 132.5, 153.4. Anal. Calcd for C<sub>7</sub>H<sub>5</sub>ClN<sub>4</sub>: C, 46.54; H, 2.77; N, 31.02. Found: C, 46.67; H, 2.57; N, 31.23.

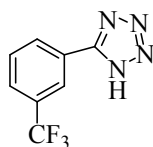

5-(3-(trifluoromethyl)phenyl)-1*H*-tetrazole (**2l**): white solid; MP: 155-156 °C (lit.<sup>[4]</sup> 156-157

°C); reaction time 4 h;  $^1\text{H}$  NMR (400 MHz, DMSO- $d_6$ ):  $\delta$  7.87 (1H, ddd,  $J = 7.8$  Hz,  $J = 8.2$  Hz,  $J = 0.7$  Hz), 7.975 (1H, bd,  $J = 7.8$  Hz), 8.33-8.42 (2H, m);  $^{13}\text{C}$  NMR (100 MHz, DMSO- $d_6$ )  $\delta$  123.3, 123.7, 125.5, 127.6, 130.0, 130.7, 130.8, 154.9. Anal. Calcd for  $\text{C}_8\text{H}_5\text{F}_3\text{N}_4$ : C, 44.86; H, 2.34; N, 26.17. Found: C, 44.56; H, 2.15; N, 26.43.

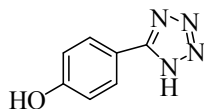

5-(4-hydroxyphenyl)-1H-tetrazole (**2m**): white solid; MP: 234-235 °C (lit.<sup>[2]</sup> 235-236 °C); reaction time 4 h;  $^1\text{H}$  NMR (400 MHz, DMSO- $d_6$ ):  $\delta$  6.96 (2H, d,  $J = 8.5$  Hz), 7.85 (2H, d,  $J = 8.5$  Hz);  $^{13}\text{C}$  NMR (100 MHz, DMSO- $d_6$ )  $\delta$  114.3, 116.1, 128.5, 154.1, 159.9. Anal. Calcd for  $\text{C}_7\text{H}_6\text{N}_4\text{O}$ : C, 51.85; H, 3.70; N, 34.57. Found: C, 51.71; H, 3.58; N, 34.71.

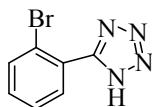

5-(2-bromophenyl)-1H-tetrazole (**2n**): brown solid; MP: 178-179 °C (lit.<sup>[8]</sup> 178-179 °C); reaction time 3 h;  $^1\text{H}$  NMR (400 MHz, DMSO- $d_6$ ):  $\delta$  7.58-7.61 (2H m,), 7.72 (1H, bd,  $J = 7.2$  Hz), 7.88 (1H, bd,  $J = 7.5$  Hz);  $^{13}\text{C}$  NMR (100 MHz, DMSO- $d_6$ )  $\delta$  121.7, 126.4, 128.1, 131.9, 132.6, 133.5, 154.6. Anal. Calcd for  $\text{C}_7\text{H}_5\text{BrN}_4$ : C, 37.35; H, 2.22; N, 24.90. Found: C, 37.21; H, 2.34; N, 24.99.

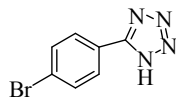

5-(4-bromophenyl)-1H-tetrazole (**2o**): brown solid; MP: 265-266 °C (lit.<sup>[2]</sup> 266-268 °C); reaction time 3 h;  $^1\text{H}$  NMR (400 MHz, DMSO- $d_6$ ):  $\delta$  7.85 (2H, d,  $J = 8.5$  Hz), 8.00 (2H, d,  $J = 8.5$  Hz);  $^{13}\text{C}$  NMR (100 MHz, DMSO- $d_6$ )  $\delta$  132.9, 129.3, 125.2, 123.5. Anal. Calcd for  $\text{C}_7\text{H}_5\text{BrN}_4$ : C, 37.35; H, 2.22; N, 24.90. Found: C, 37.29; H, 2.37; N, 24.87.

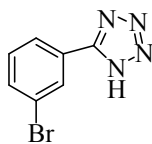

5-(3-bromophenyl)-1*H*-tetrazole (**2p**): brown solid; MP: 154-155 °C (lit.<sup>[8]</sup> 155-156 °C); reaction time 3 h; <sup>1</sup>H NMR (400 MHz, DMSO-*d*<sub>6</sub>): δ 7.62 (1H, s), 7.85 (1H, s), 8.09 (1H, s), 8.25 (1H, s); <sup>13</sup>C NMR (100 MHz, DMSO-*d*<sub>6</sub>) δ 122.5, 126.0, 127.0, 129.3, 132.0, 133.5, 154.6. Anal. Calcd for C<sub>7</sub>H<sub>5</sub>BrN<sub>4</sub>: C, 37.35; H, 2.22; N, 24.90. Found: C, 37.55; H, 2.43; N, 24.71.

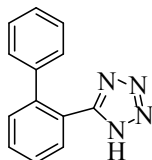

5-(biphenyl-2-yl)-1*H*-tetrazole (**2q**): white solid; MP: 148-149 °C (lit.<sup>[5]</sup> 149-150 °C); reaction time 6 h; <sup>1</sup>H NMR (400 MHz, DMSO-*d*<sub>6</sub>): δ 7.05-7.17 (2H, m), 7.28-7.36 (3H, m), 7.53-7.62 (2H, m), 7.64-7.74 (2H, m); <sup>13</sup>C NMR (100 MHz, DMSO-*d*<sub>6</sub>) δ 123.4, 127.4, 127.7, 128.2, 128.7, 130.5, 130.6, 131.1, 139.2, 141.5, 155.0. Anal. Calcd for C<sub>13</sub>H<sub>10</sub>N<sub>4</sub>: C, 70.27; H, 4.50; N, 25.23. Found: C, 70.38; H, 4.69; N, 25.02.

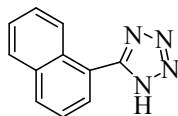

5-(naphthalen-1-yl)-1*H*-tetrazole (**2r**): white solid; MP: 262-263 °C (lit.<sup>[2]</sup> 261-262 °C); reaction time 4 h; <sup>1</sup>H NMR (400 MHz, DMSO-*d*<sub>6</sub>): δ 7.63-7.70 (3H, m), 7.99 (1H, dd, *J* = 7.2 Hz, *J* = 1.0 Hz), 8.08-8.11 (1H, m), 8.19 (1H, bd, *J* = 8.2 Hz), 8.56 (1H, dd, *J* = 7.3 Hz, *J* = 1.8 Hz); <sup>13</sup>C NMR (100 MHz, DMSO-*d*<sub>6</sub>) δ 121.4, 125.0, 125.3, 126.7, 127.7, 128.4, 128.6, 129.9, 131.4, 133.4, 155.1. Anal. Calcd for C<sub>11</sub>H<sub>8</sub>N<sub>4</sub>: C, 67.35; H, 4.08; N, 28.57. Found: C, 67.56; H, 4.31; N, 28.35.

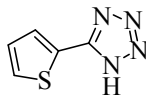

5-(thiophen-2-yl)-1*H*-tetrazole (**2s**): white solid; MP: 203-204 °C (lit.<sup>[6]</sup> 201-203 °C); reaction time 4 h; <sup>1</sup>H NMR (400 MHz, DMSO-*d*<sub>6</sub>): δ 7.28 (1H, t, *J* = 4.0 Hz), 7.79 (1H, d, *J* = 4.0 Hz), 7.86 (1H, d, *J* = 4.0 Hz); <sup>13</sup>C NMR (100 MHz, DMSO-*d*<sub>6</sub>) δ 125.4, 128.6, 129.2, 130.4, 151.3. Anal. Calcd for C<sub>5</sub>H<sub>4</sub>N<sub>4</sub>S: C, 39.47; H, 2.63; N, 36.84. Found: C, 39.38; H, 2.41; N, 36.99.

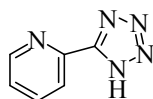

5-(2-pyridyl)-1*H*-tetrazole (**2t**): white solid; MP: 210-211 °C (lit.<sup>[2]</sup> 211-212 °C); reaction time 4 h; <sup>1</sup>H NMR (400 MHz, DMSO-*d*<sub>6</sub>): δ 7.41 (1H, m), 7.78 (1H, m), 8.02 (1H, d, *J* = 8.0 Hz), 8.50 (1H, d, *J* = 3.2 Hz); <sup>13</sup>C NMR (100 MHz, DMSO-*d*<sub>6</sub>) δ 123.0, 126.5, 138.6, 144.1, 150.5, 155.2. Anal. Calcd for C<sub>6</sub>H<sub>5</sub>N<sub>5</sub>: C, 48.98; H, 3.40; N, 47.62. Found: C, 48.83; H, 3.54; N, 47.73.

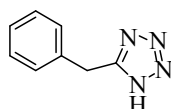

5-benzyl-1*H*-tetrazole (**2u**): white solid; MP: 122-123 °C (lit.<sup>[1]</sup> 123-125 °C); reaction time 6 h; <sup>1</sup>H NMR (400 MHz, DMSO-*d*<sub>6</sub>): δ 4.28 (2H, s), 7.24-7.29 (3H, m), 7.31-7.737 (2H, m); <sup>13</sup>C NMR (100 MHz, DMSO-*d*<sub>6</sub>) δ 28.8, 126.9, 128.6, 128.6, 135.9, 155.2. Anal. Calcd for C<sub>8</sub>H<sub>8</sub>N<sub>4</sub>: C, 60.00; H, 5.00; N, 35.00. Found: C, 60.14; H, 5.12; N, 34.89.

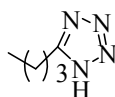

5-butyl-1*H*-tetrazole (**2v**): white solid; MP: 41-42 °C (lit.<sup>[5]</sup> 41-42 °C); reaction time 8 h; <sup>1</sup>H NMR (400 MHz, DMSO-*d*<sub>6</sub>): δ 0.89 (3H, t, *J* = 7.4 Hz), 1.18-1.30 (2H, m), 1.59-1.67 (2H, m), 2.87 (2H, t, *J* = 7.5 Hz); <sup>13</sup>C NMR (100 MHz, DMSO-*d*<sub>6</sub>) δ 13.4, 21.4, 22.3, 29.0, 155.9. Anal. Calcd for C<sub>5</sub>H<sub>10</sub>N<sub>4</sub>: C, 47.62; H, 7.94; N, 44.44. Found: C, 47.51; H, 8.04; N, 44.31.

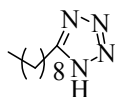

5-nonyl-1*H*-tetrazole (**2w**): yellow solid; MP: 28-29 °C; reaction time 8 h; <sup>1</sup>H NMR (400 MHz, DMSO-*d*<sub>6</sub>): δ 0.85 (3H, t, *J* = 6.7 Hz), 1.26 (12H, m), 1.68 (2H, m), 2.85 (2H, t, *J* = 7.5 Hz); <sup>13</sup>C NMR (100 MHz, DMSO-*d*<sub>6</sub>) δ 13.9, 22.1, 22.7, 27.0, 28.3, 28.5, 31.2, 156.0. Anal. Calcd for C<sub>10</sub>H<sub>20</sub>N<sub>4</sub>: C, 61.22; H, 10.20; N, 28.57. Found: C, 61.43; H, 10.43; N, 28.38.

- [2] M. Esmailpour, J. Javidi, S. Zahmatkesh, *Appl. Organometal. Chem.* 2016, 30, 897.
- [3] P. Moradi, A. Ghorbani-Choghamarani, *Appl. Organometal. Chem.* 2017, 31, e3602.
- [4] Z. Wang, Z. Liu, S. H. Cheon, *Bull. Korean Chem. Soc.* 2015, 36, 198.
- [5] D. Amantini, R. Beleggia, F. Fringuelli, F. Pizzo, L. Vaccaro, *J. Org. Chem.* 2004, 69, 2896.
- [6] A. N. Chermahini, A. Teimouri, F. Momenbeik, A. Zarei, Z. Dalirnasab, A. Ghaedi, M. Roosta, *J. Heterocyclic Chem.* 2010, 47, 913.
- [7] M. Esmailpour, J. Javidi, F. N. Dodeji, M. M. Abarghoui, *J. Mol. Catal. A: Chem.* 2014, 393, 18.
- [8] S. Rostamizadeh, H. Ghaieni, R. Aryan, A. Amani, *Chin. Chem. Lett.* 2009, 20, 1311.



**<sup>1</sup>H and <sup>13</sup>C NMR Spectra of all compounds (2a-w)**

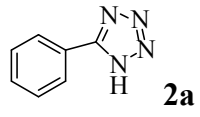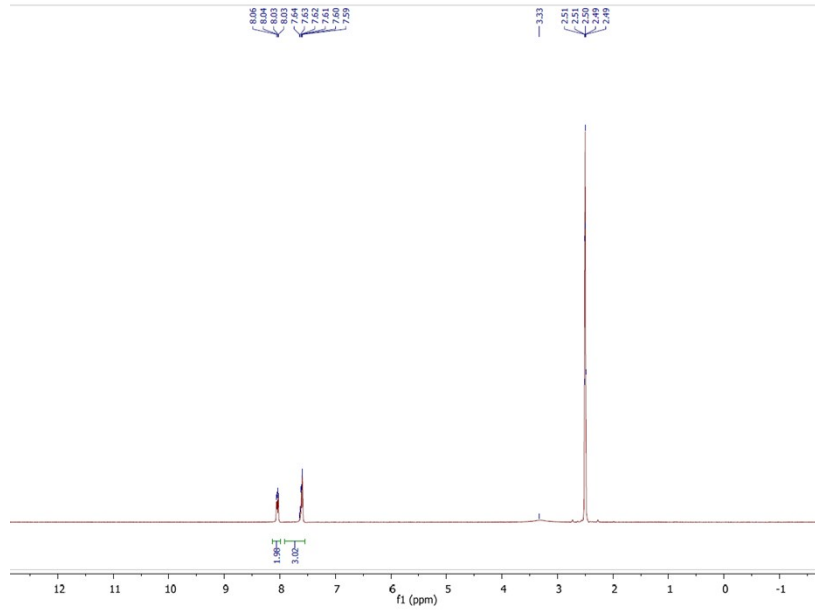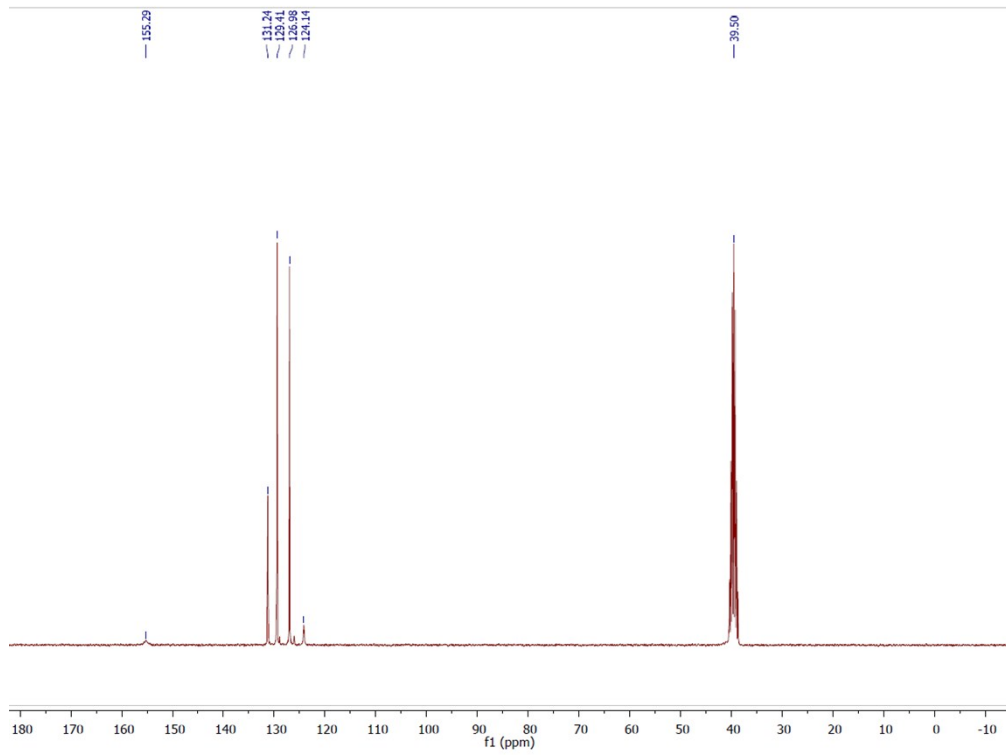

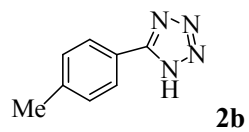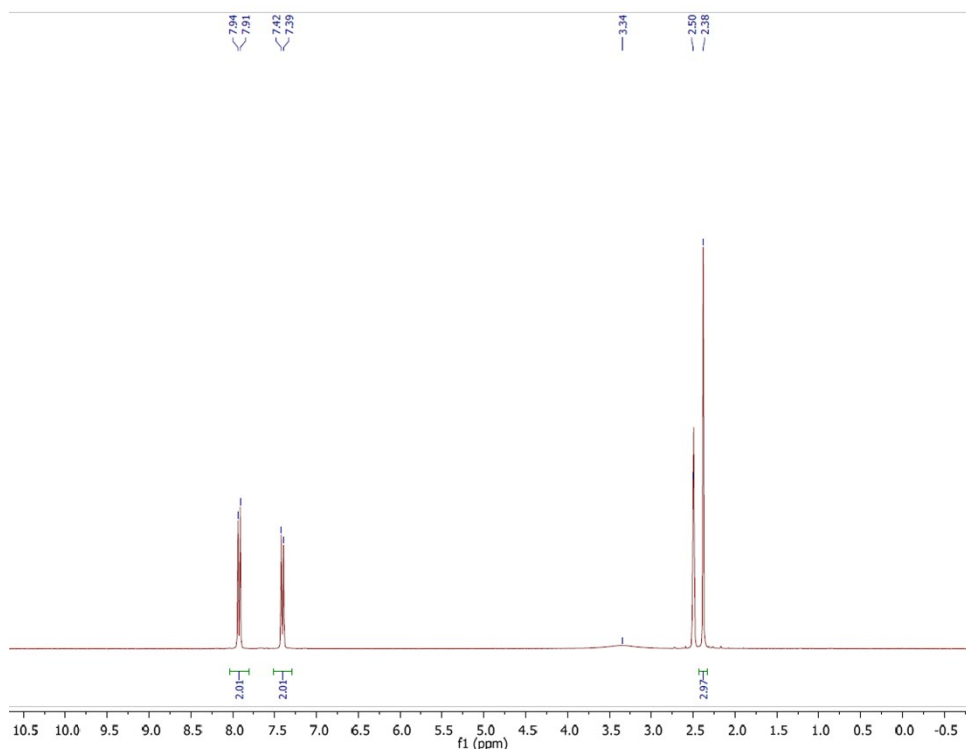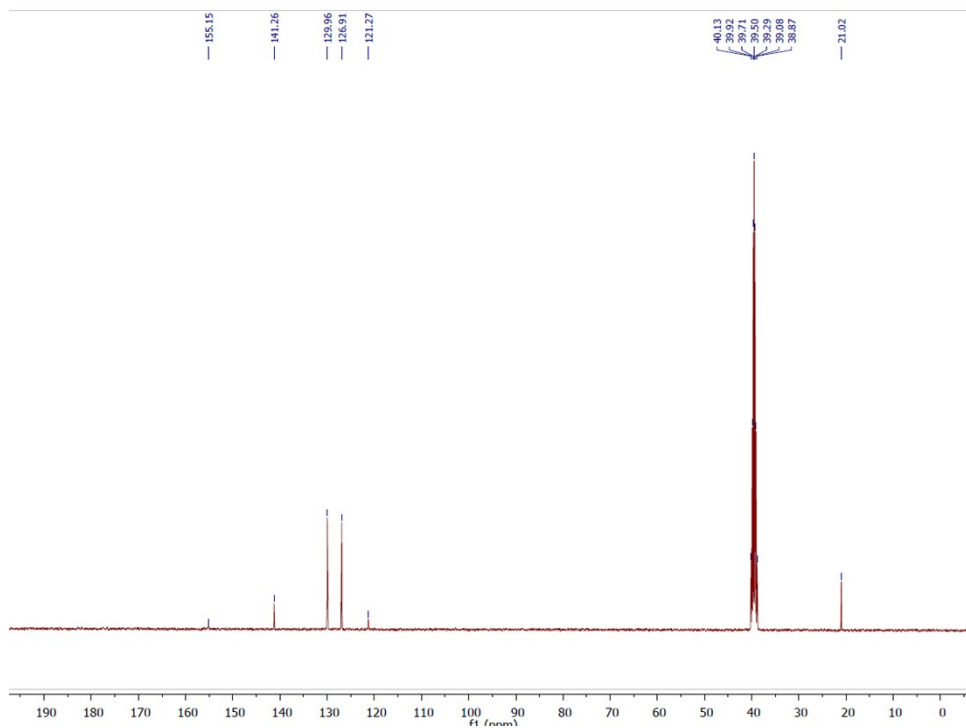

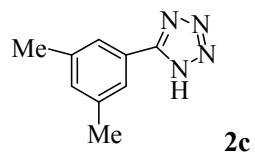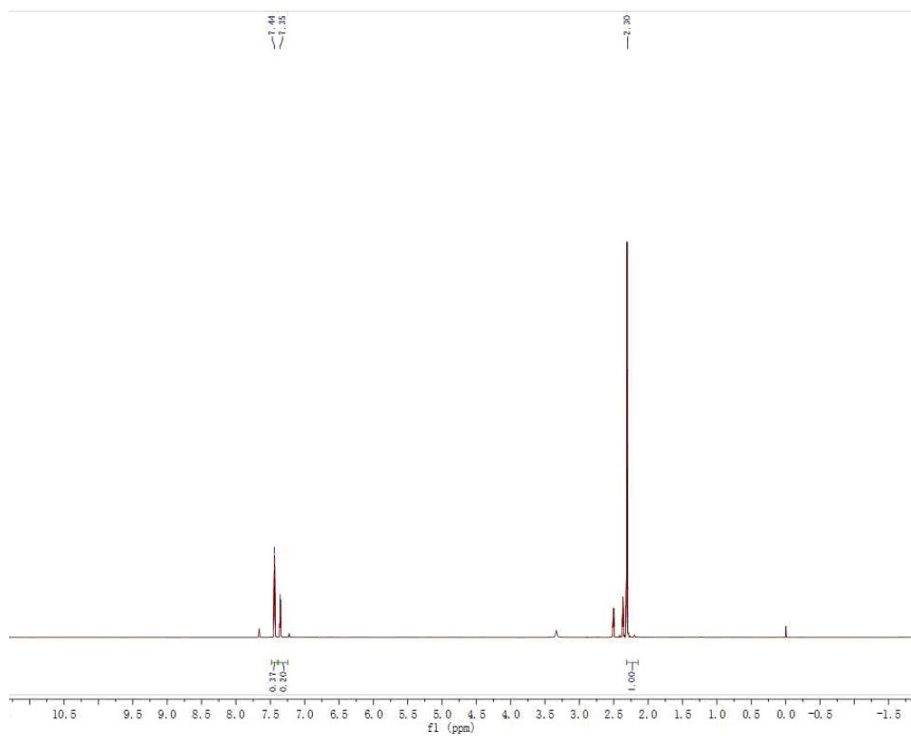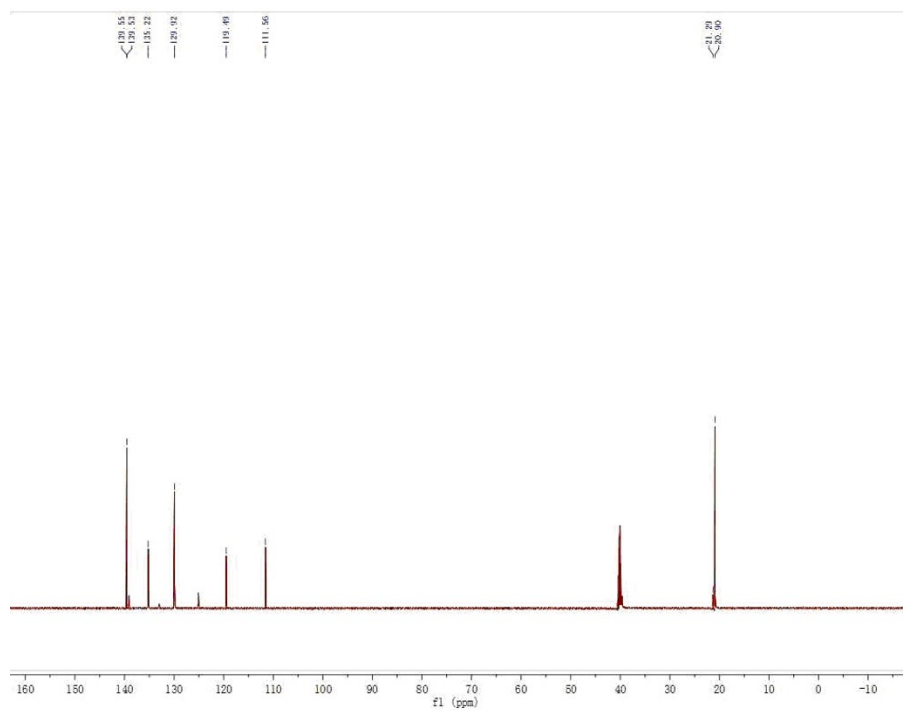

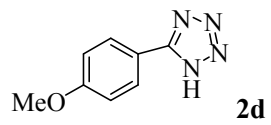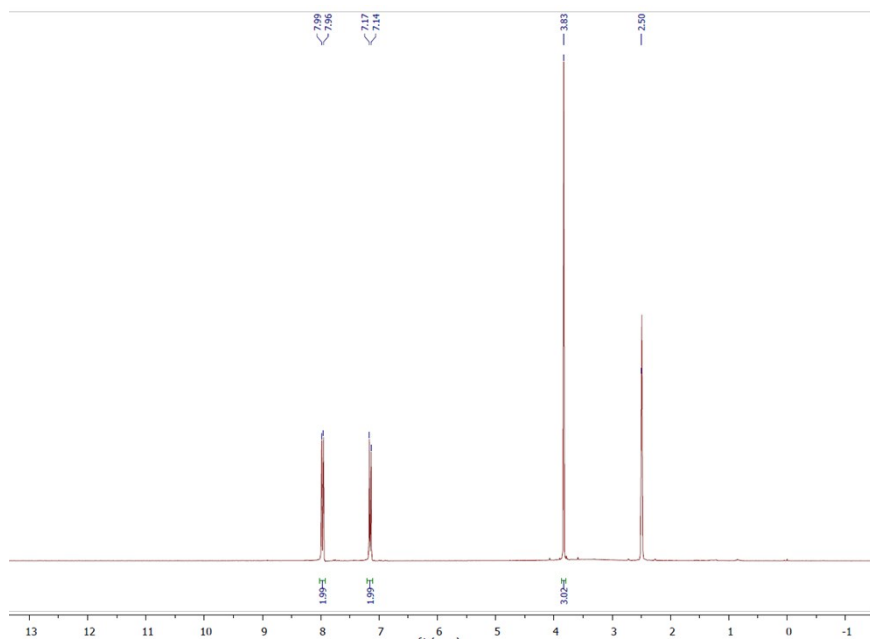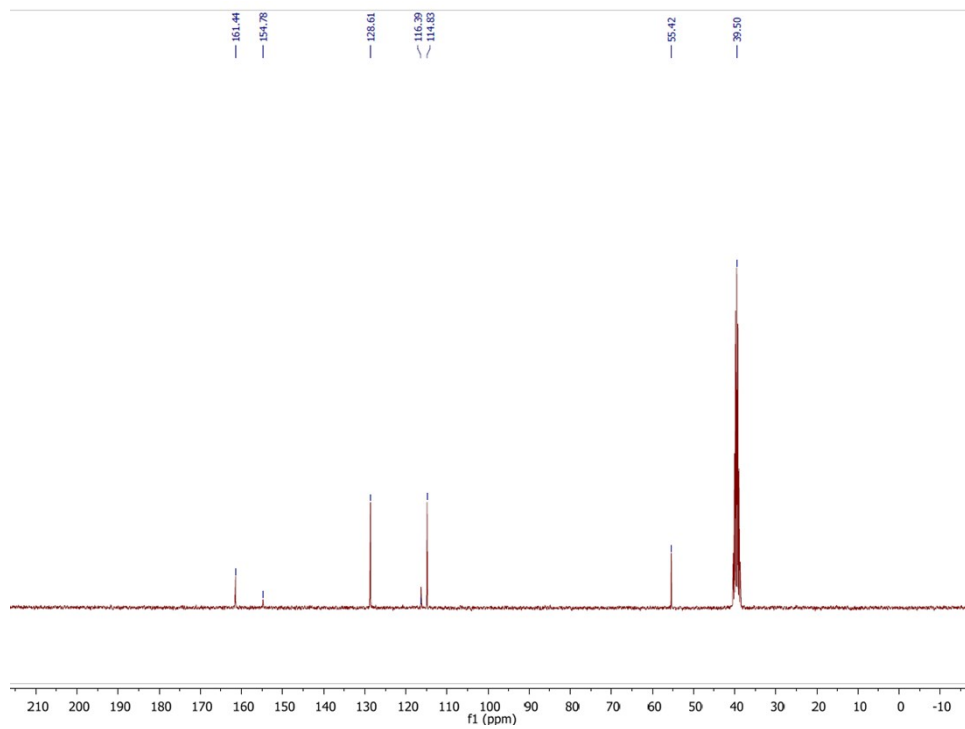

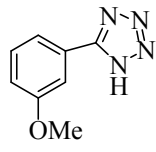

2e

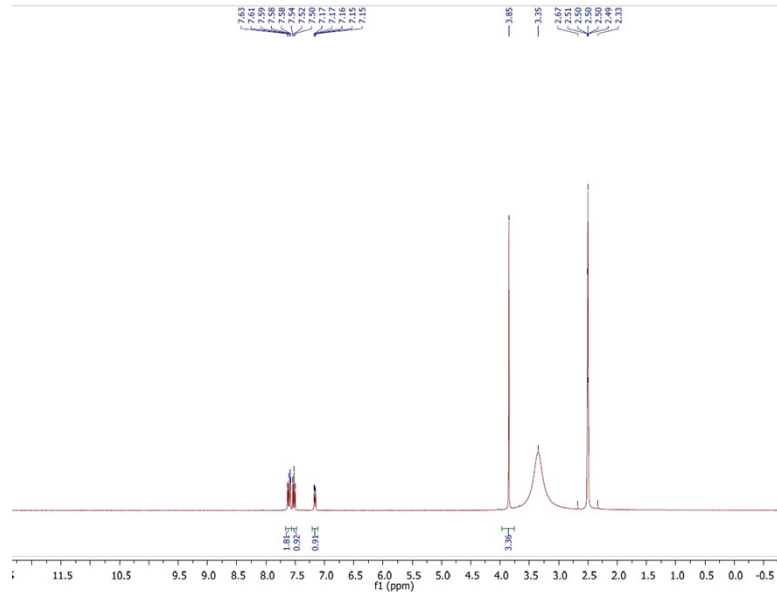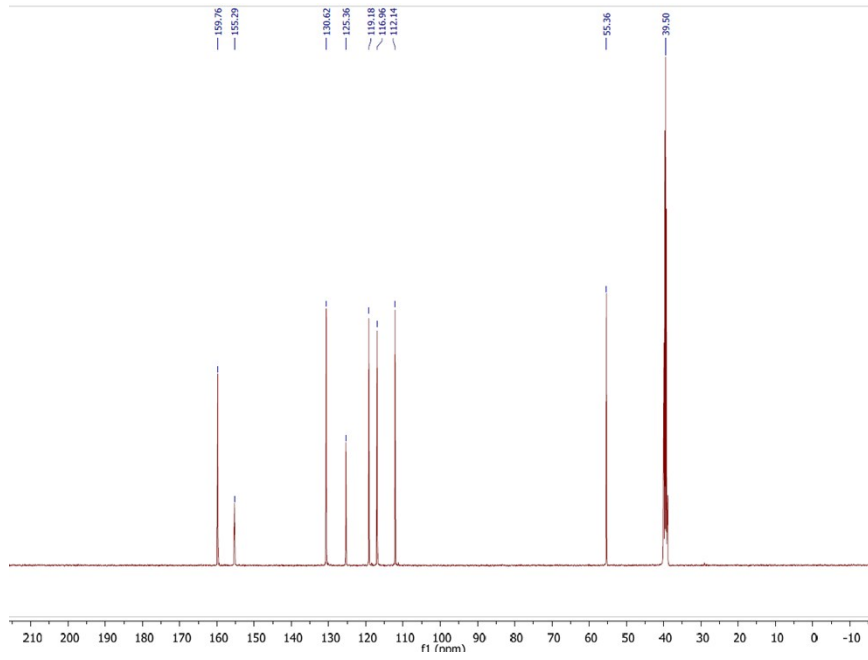

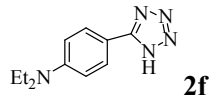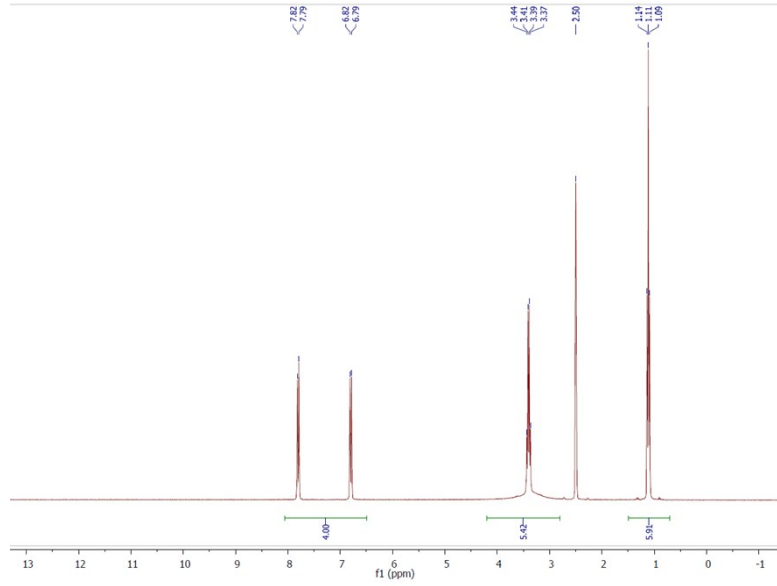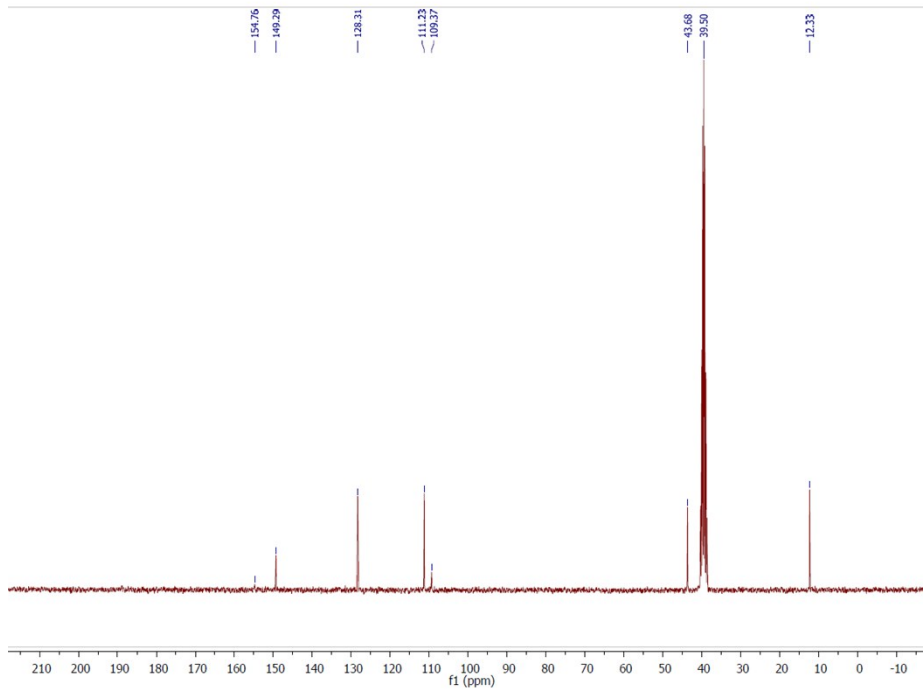

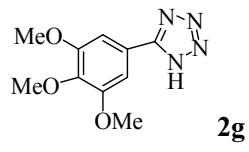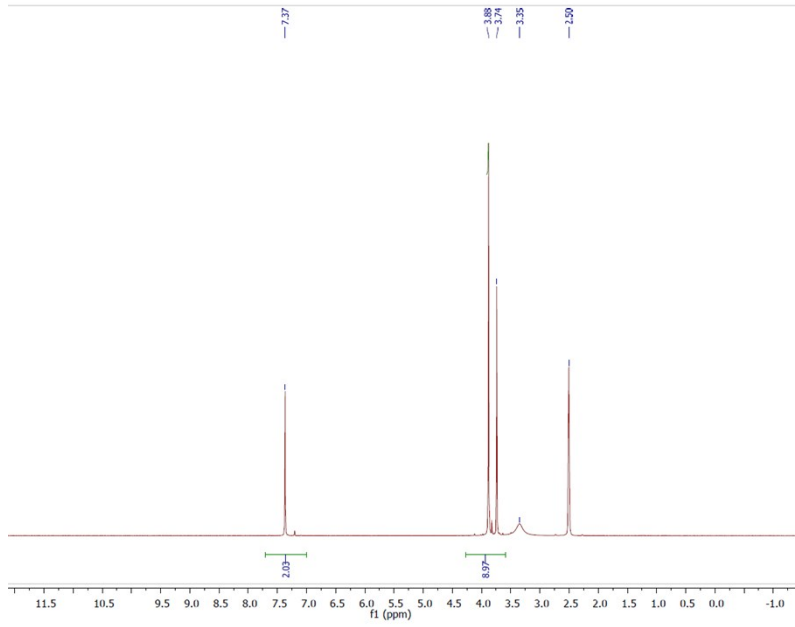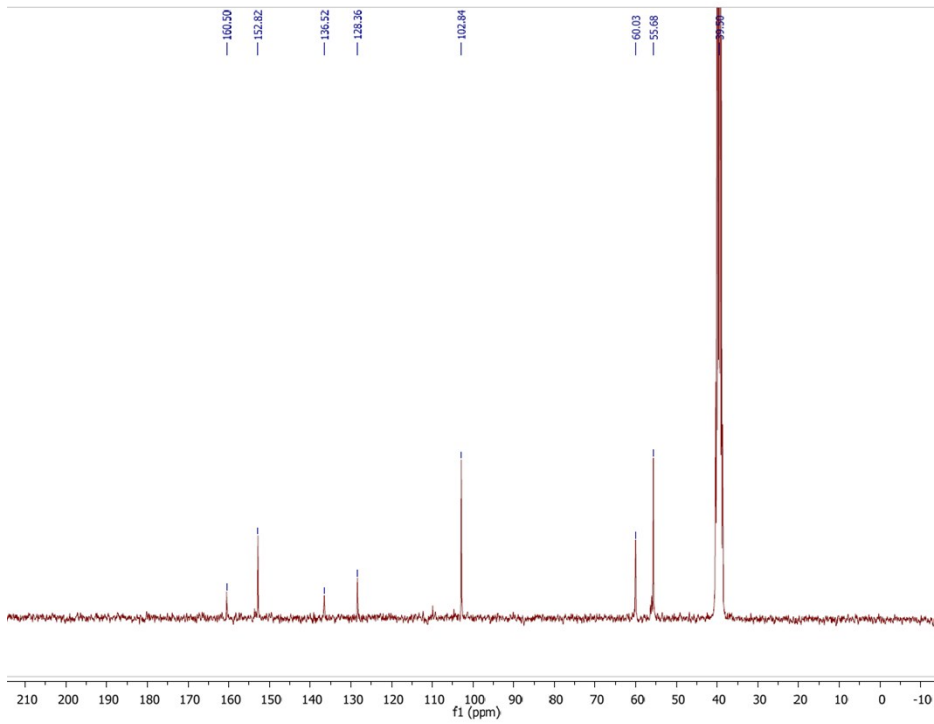

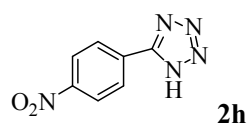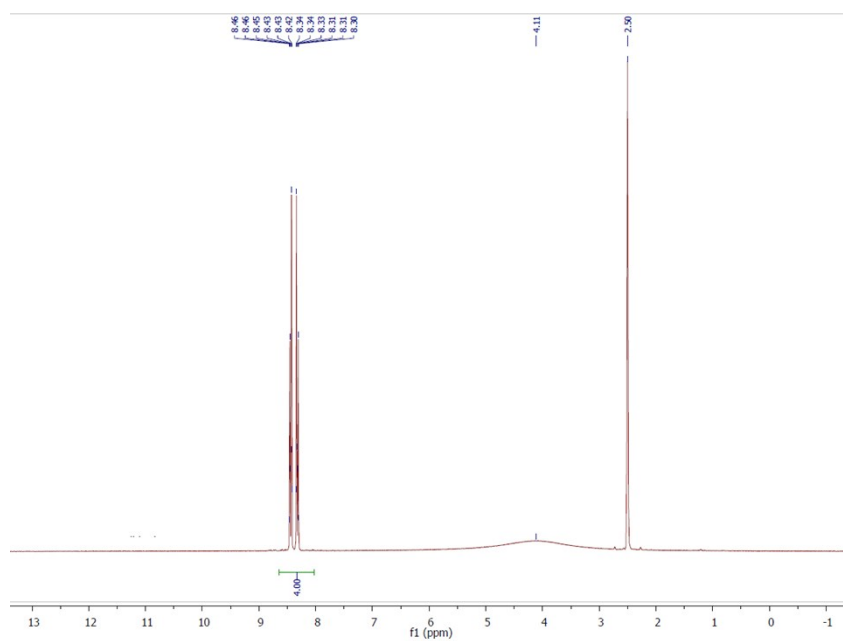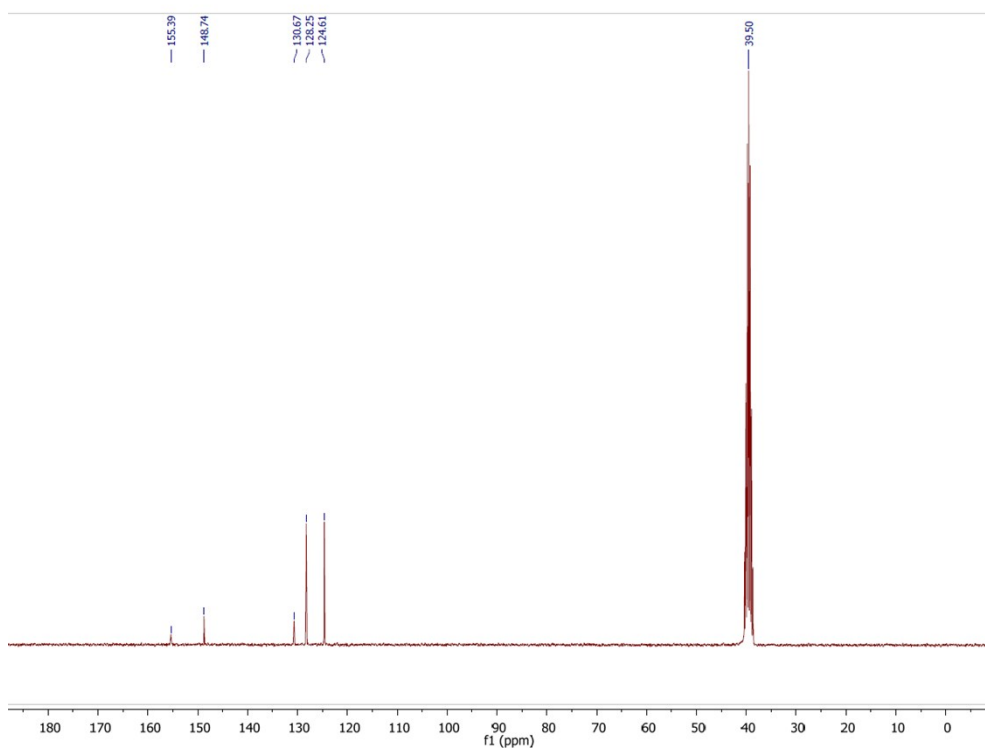



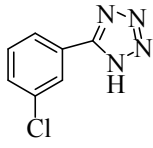

2i

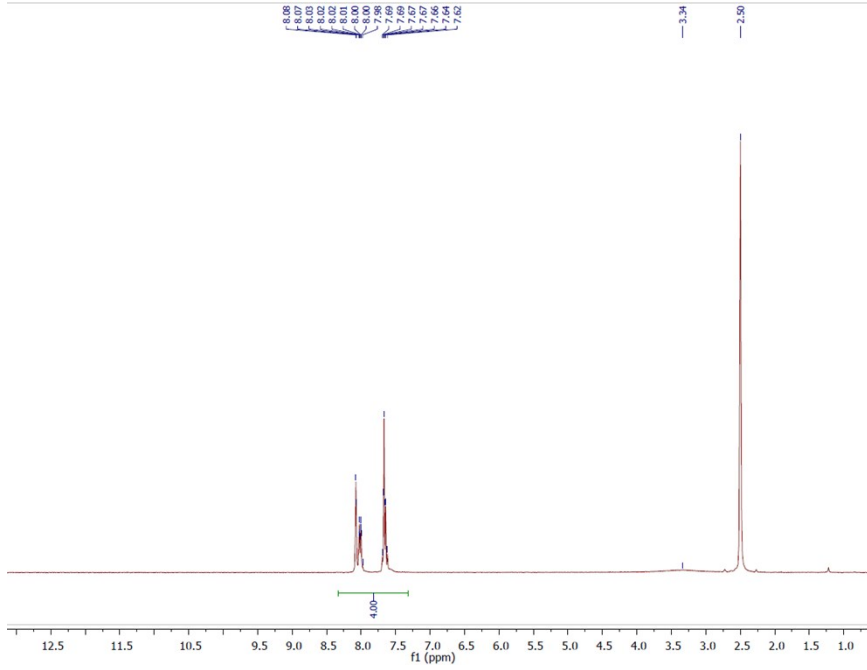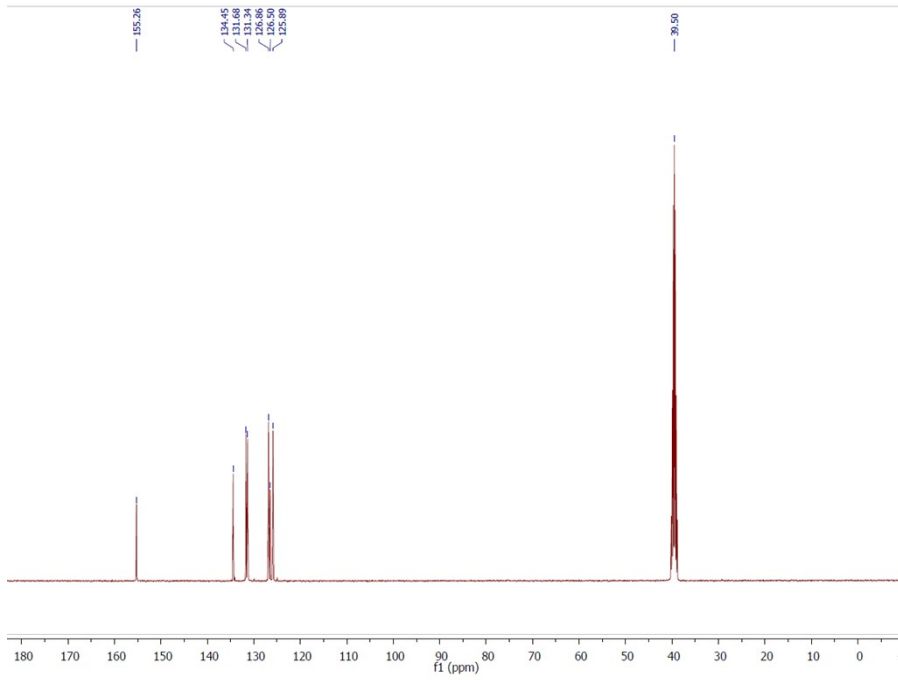

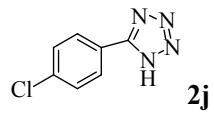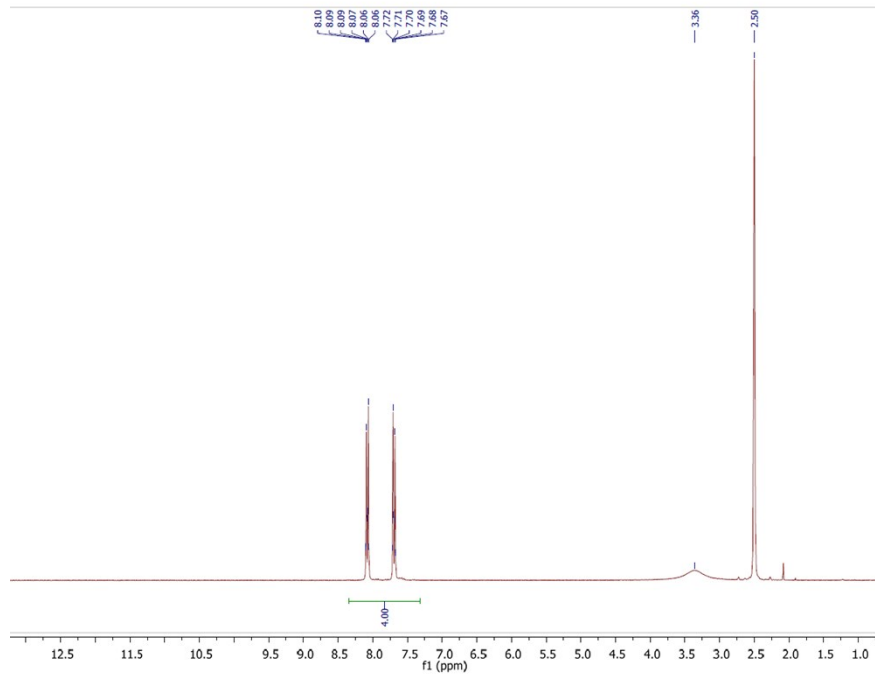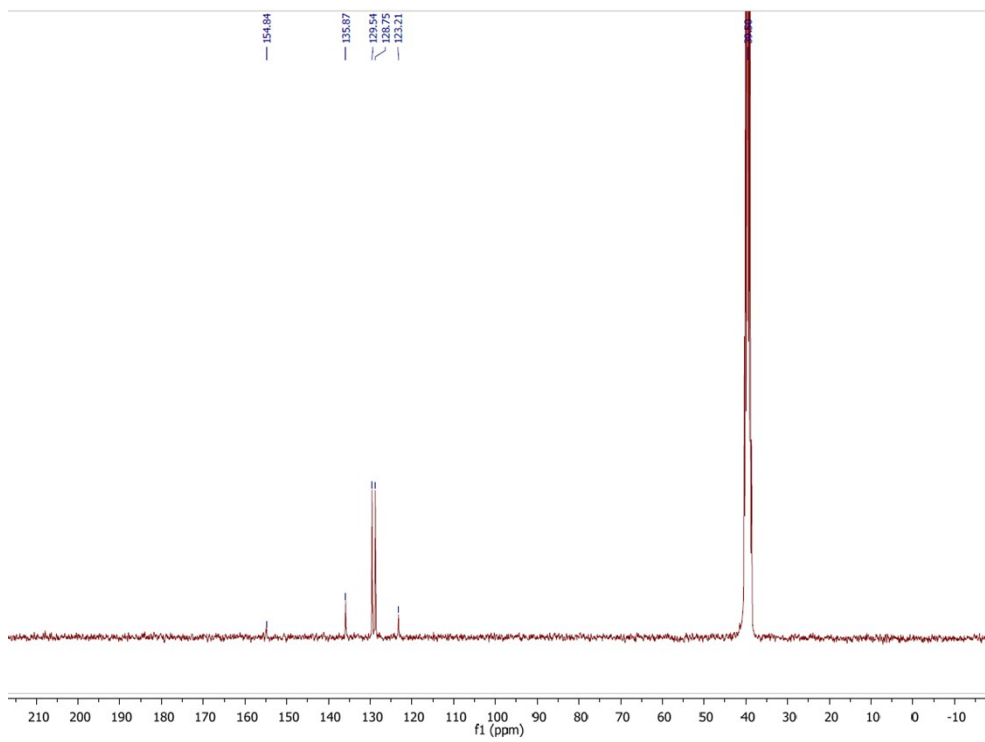

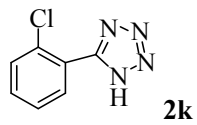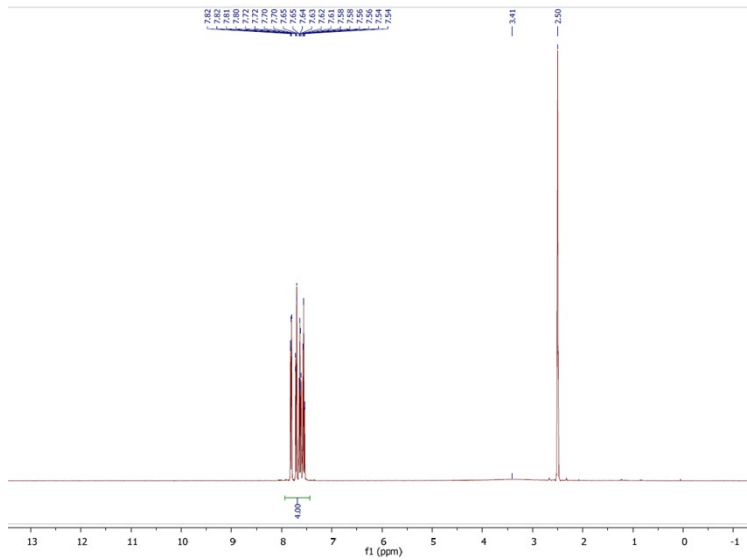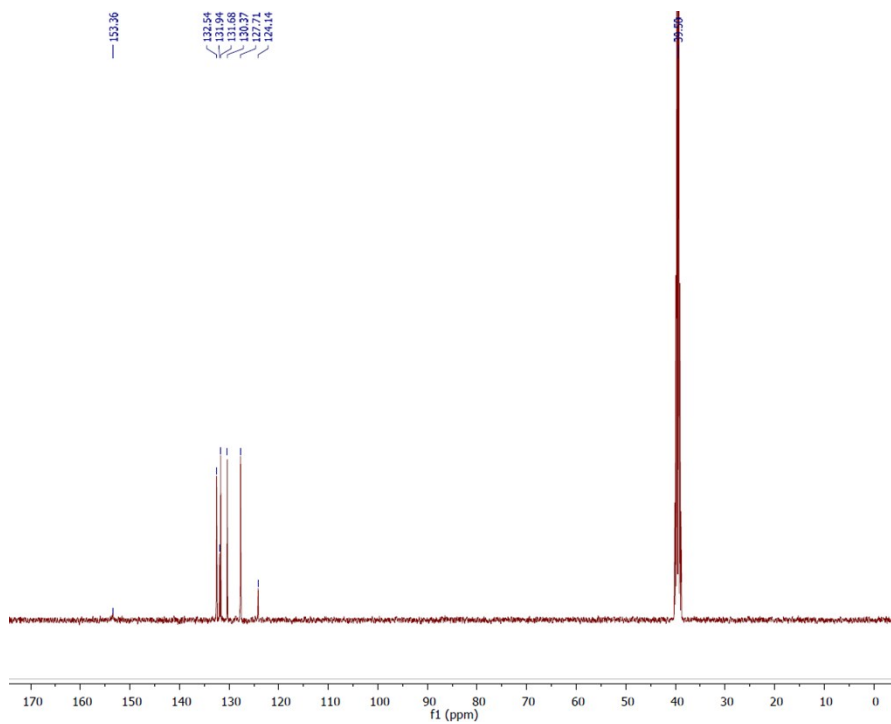

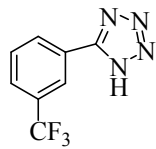

21

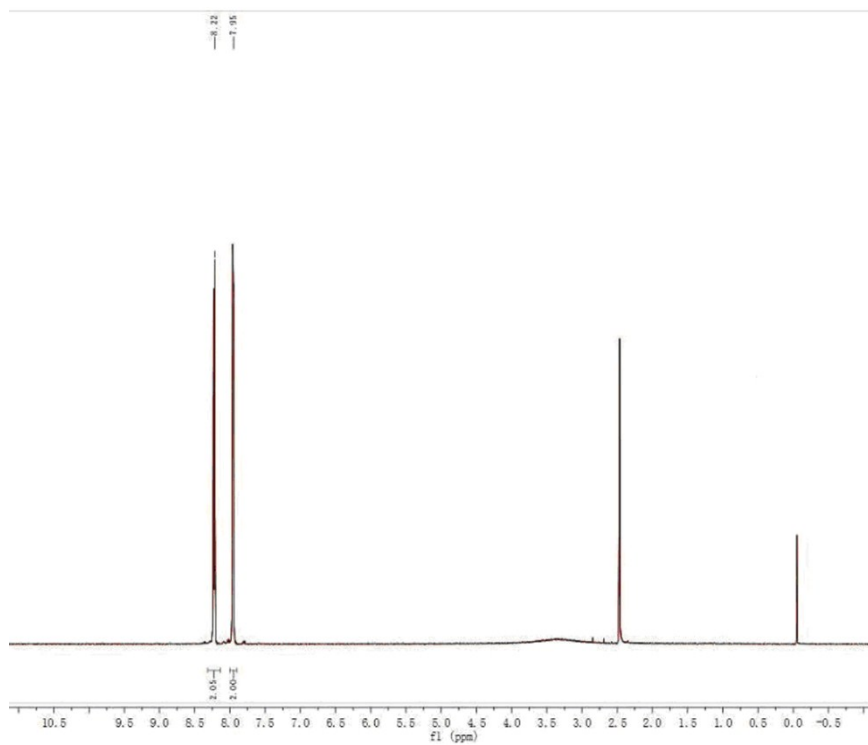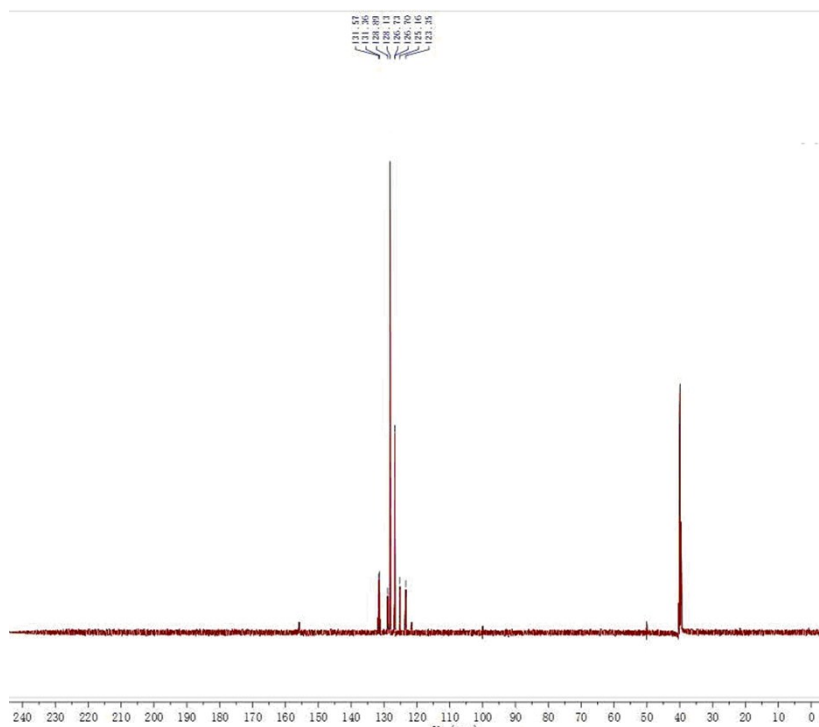

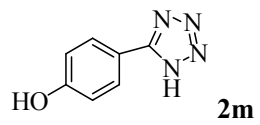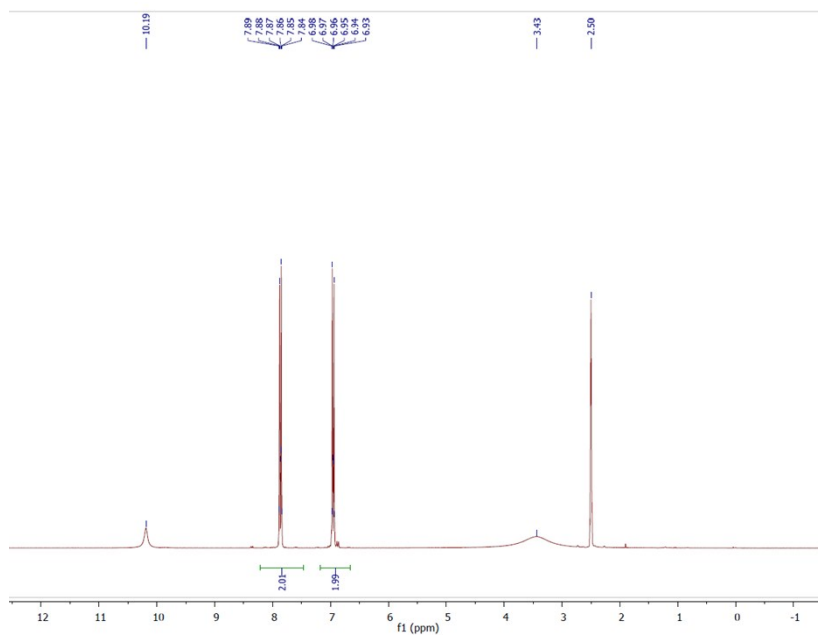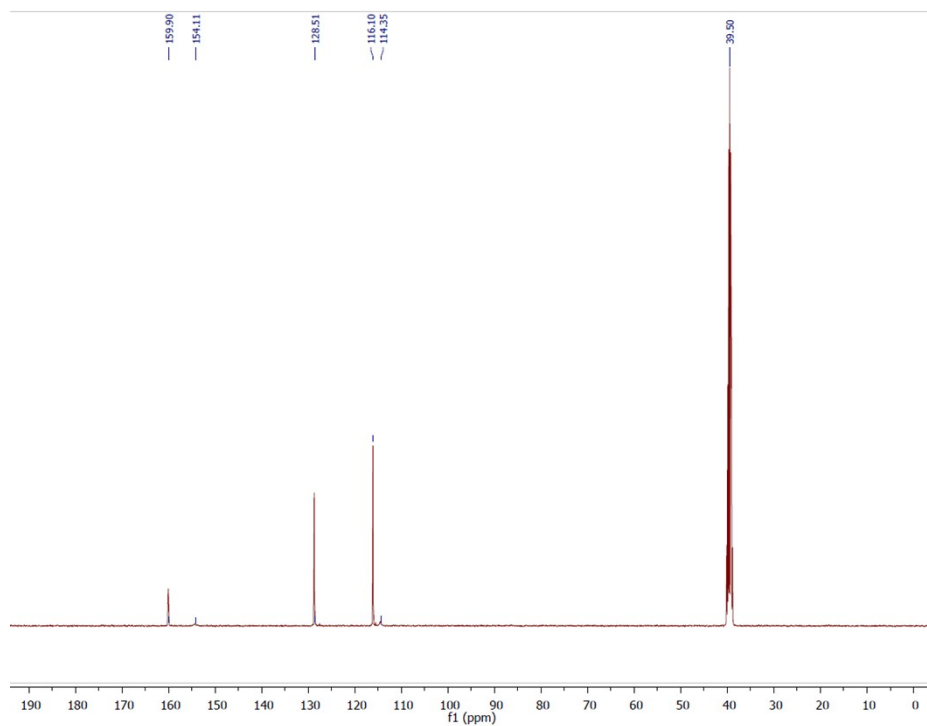

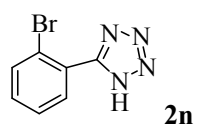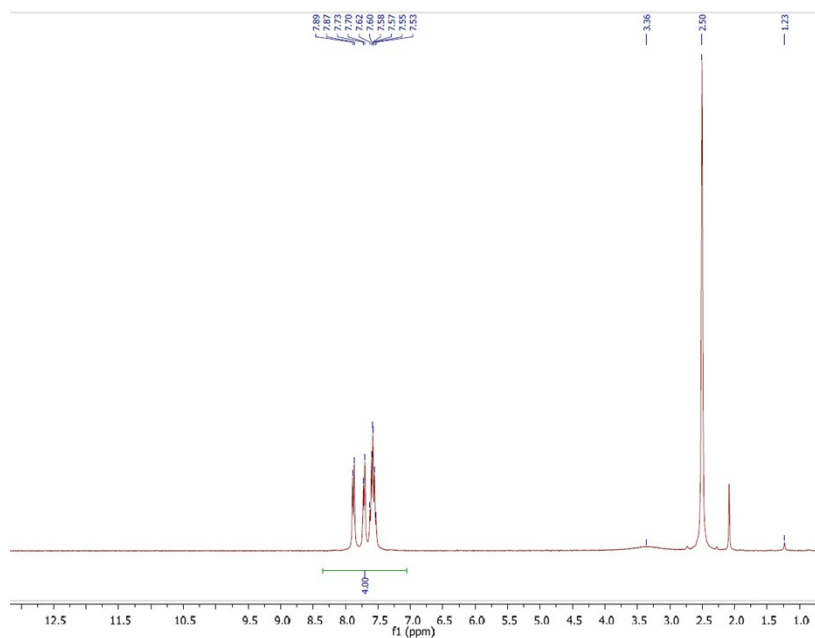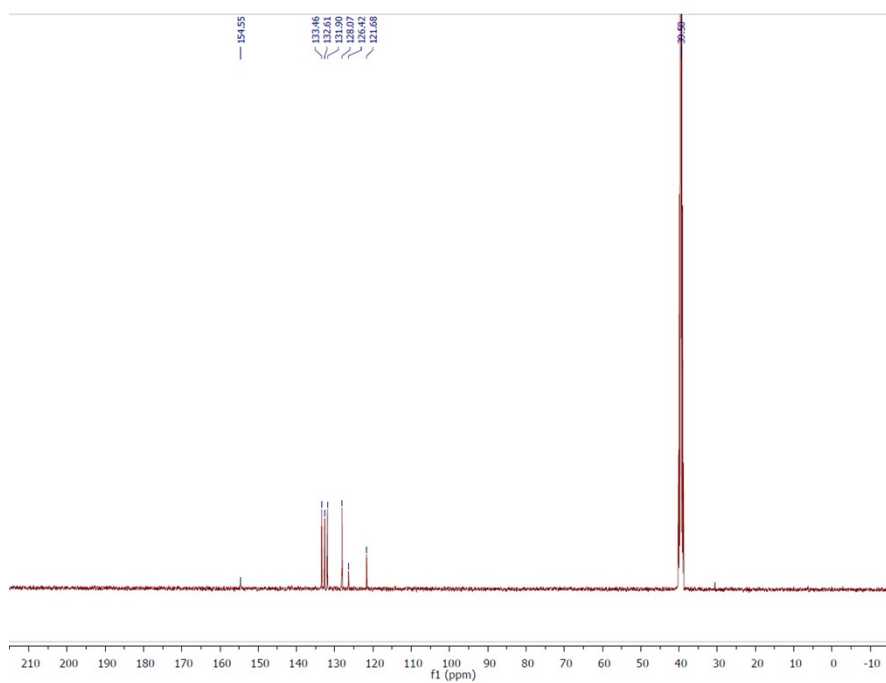







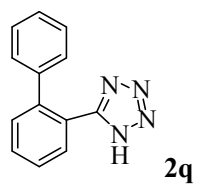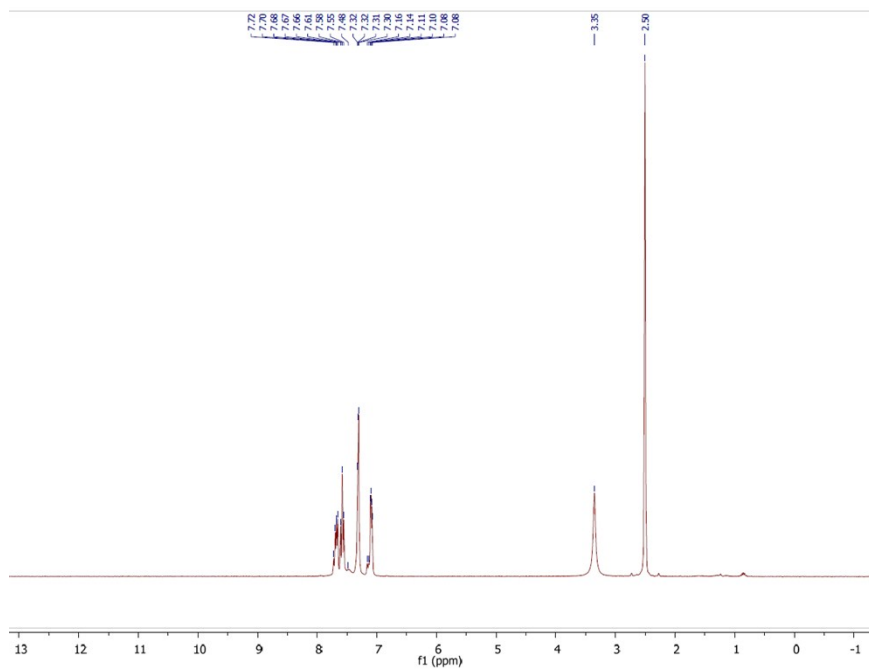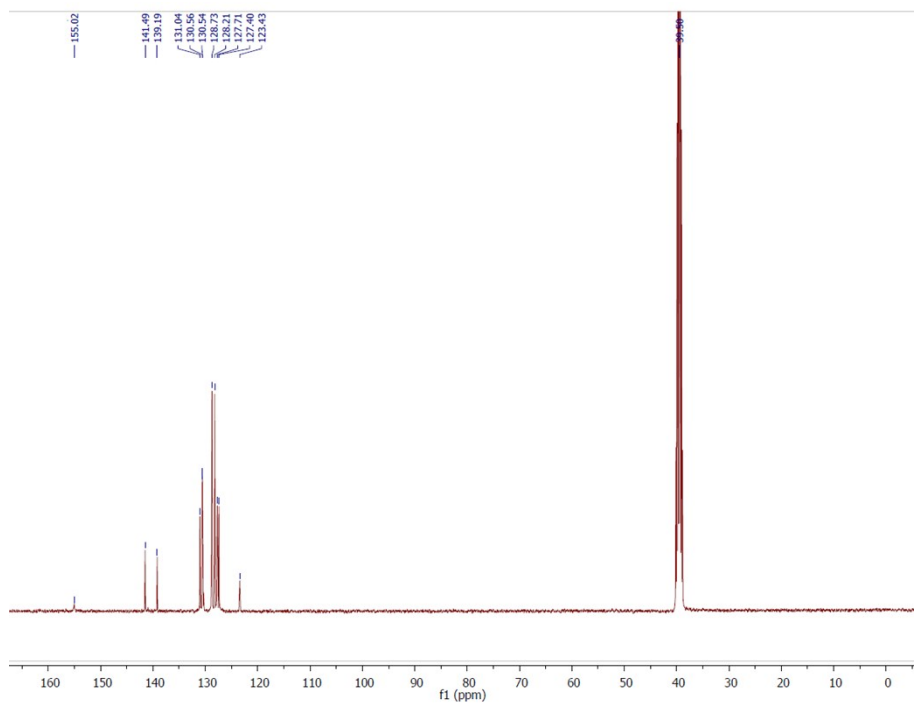

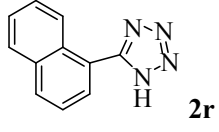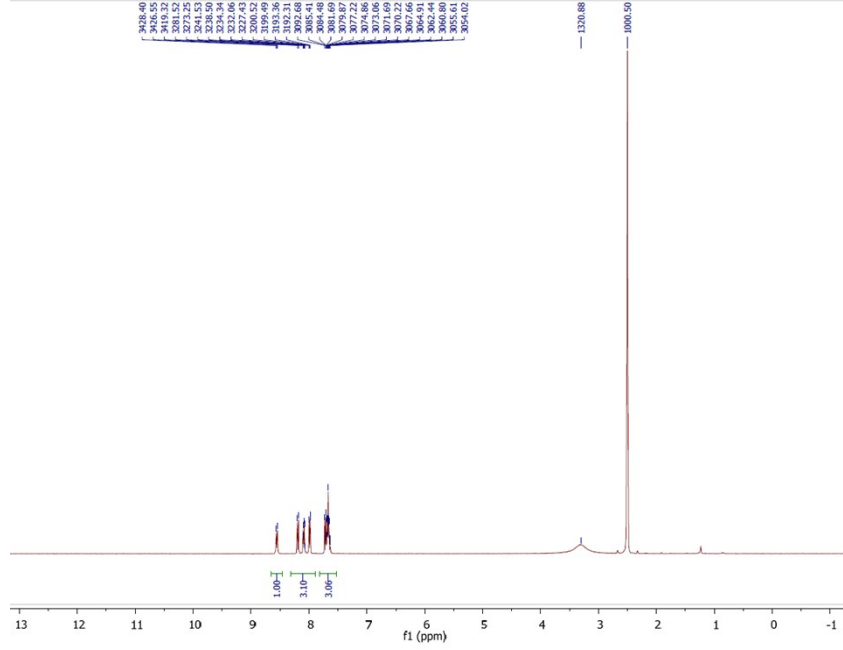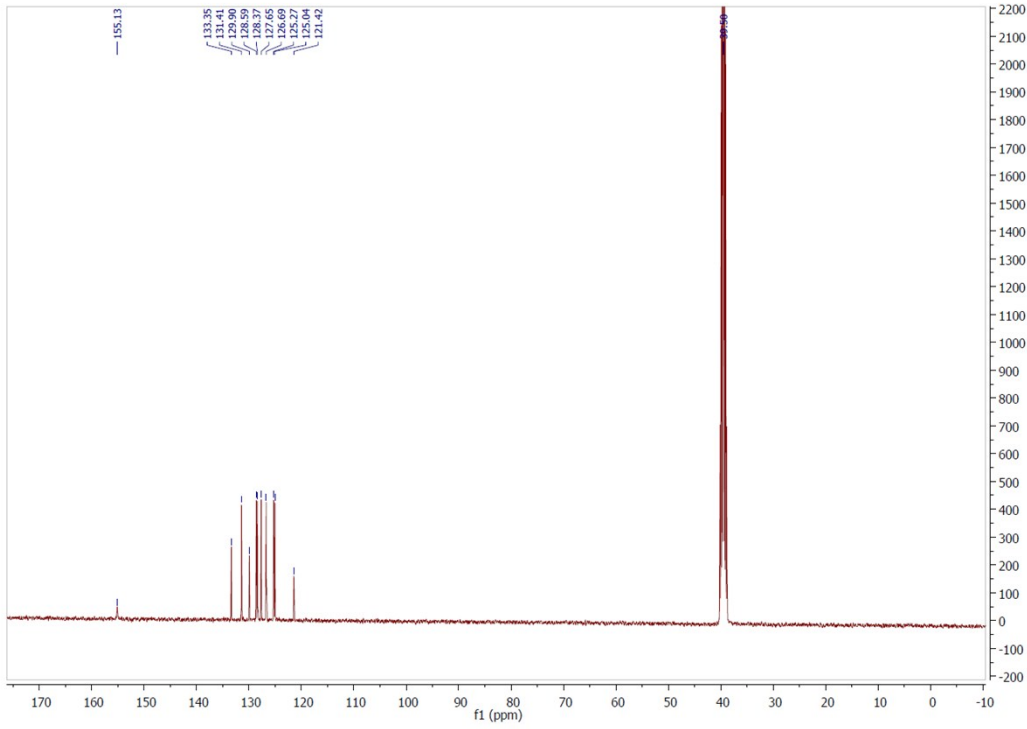

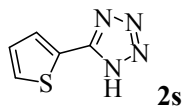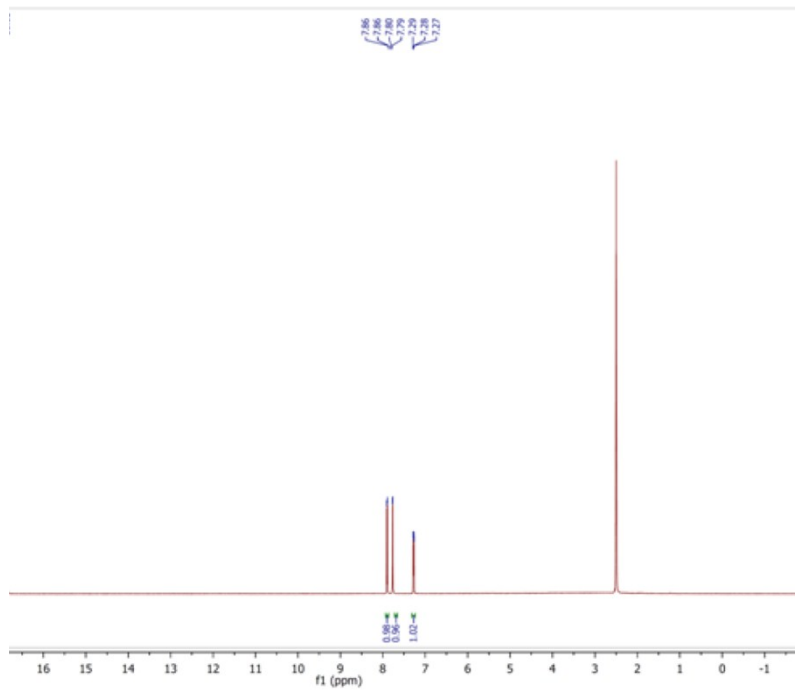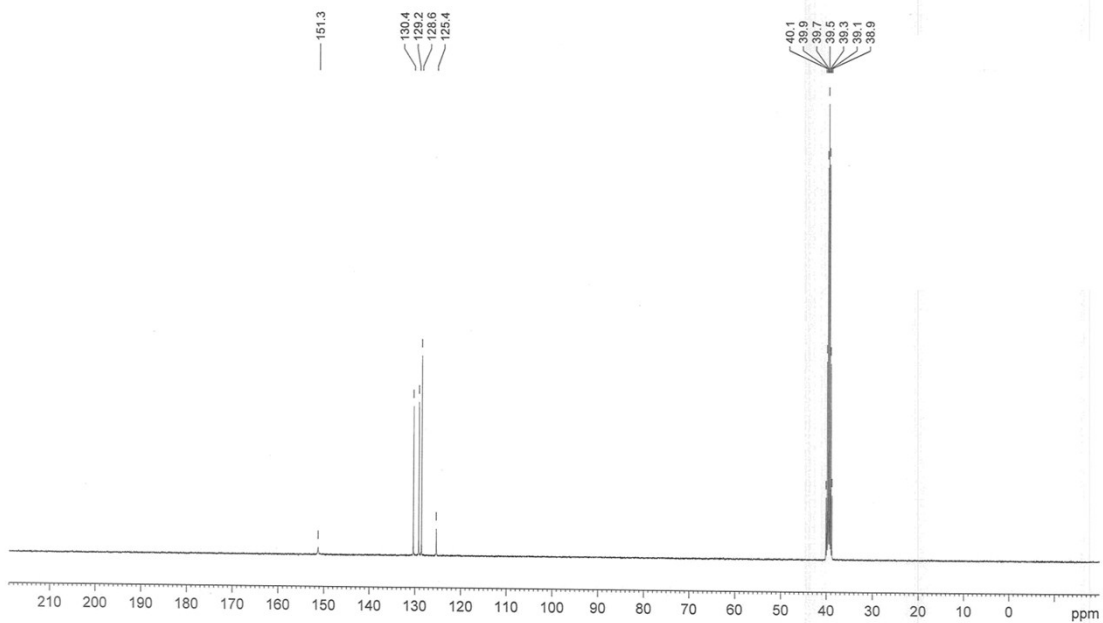

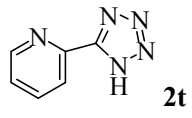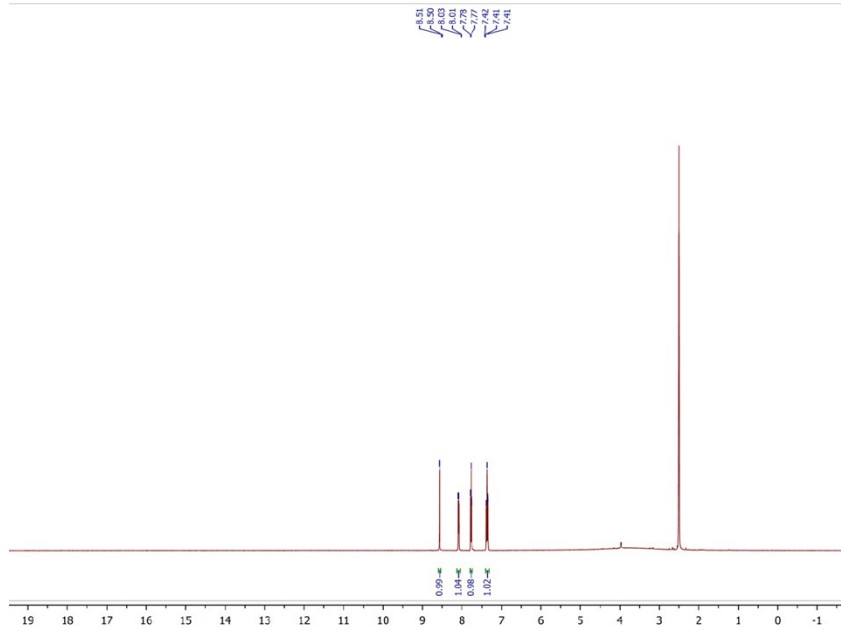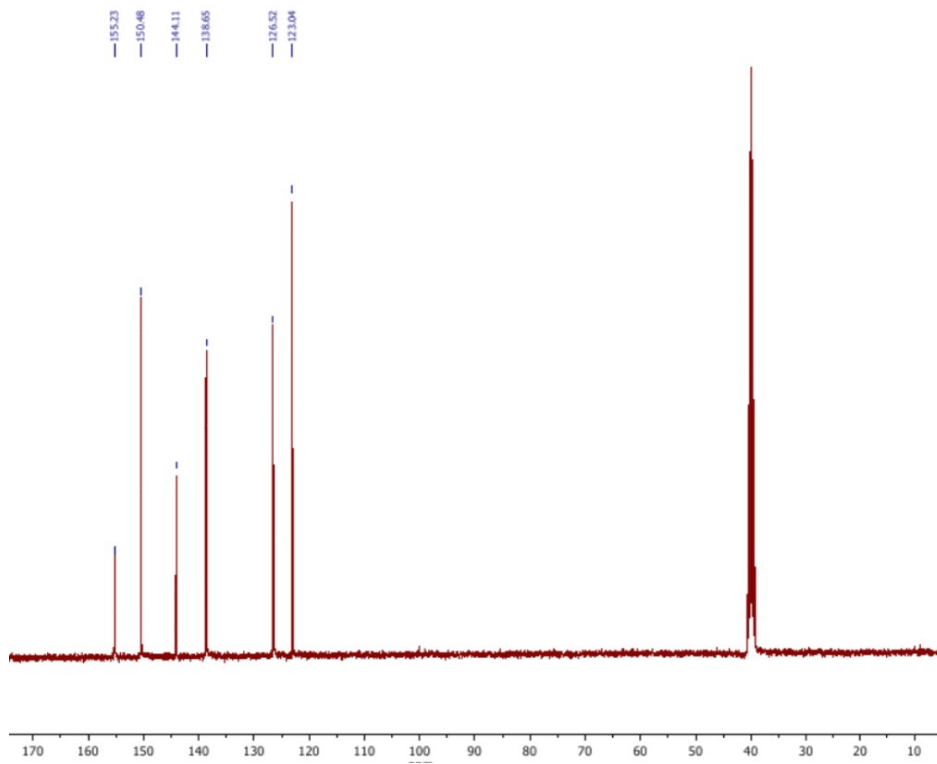

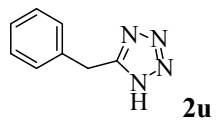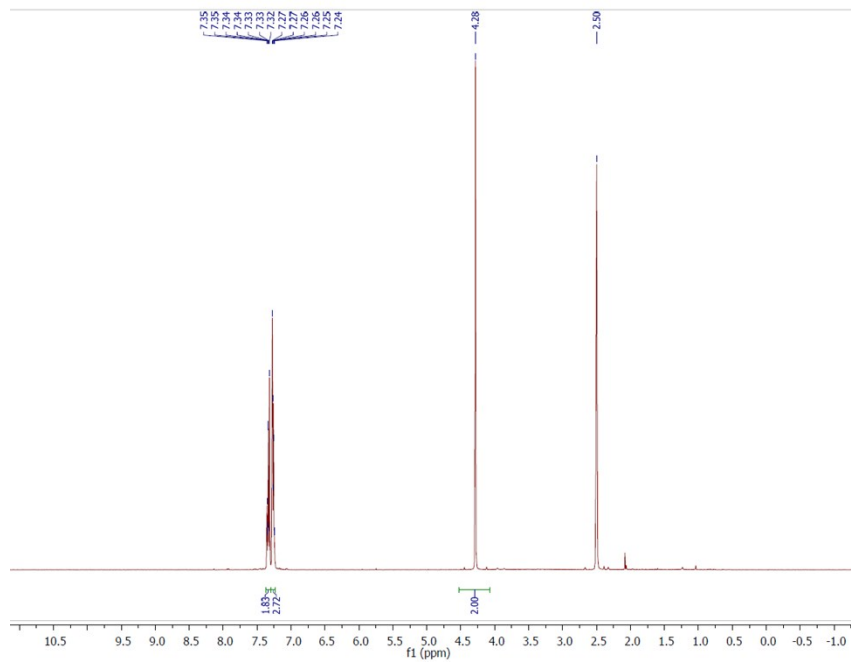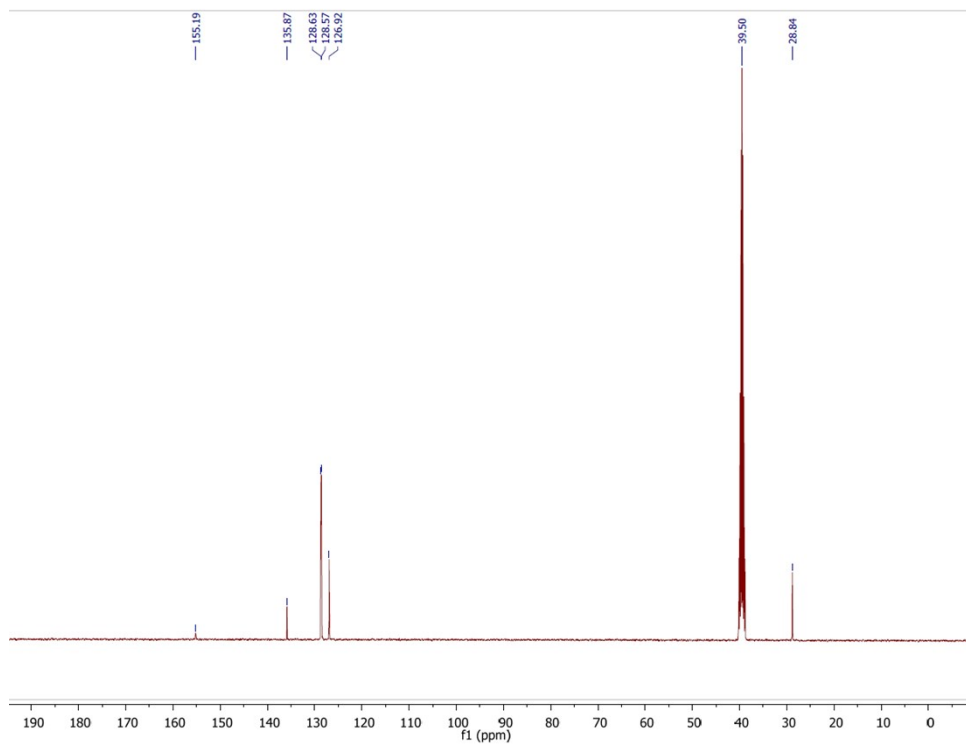

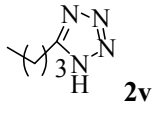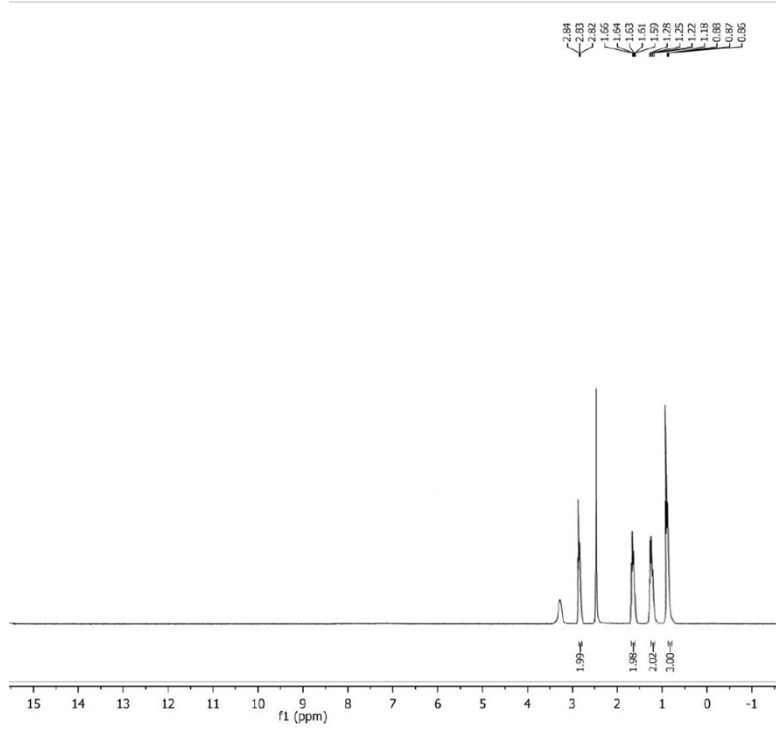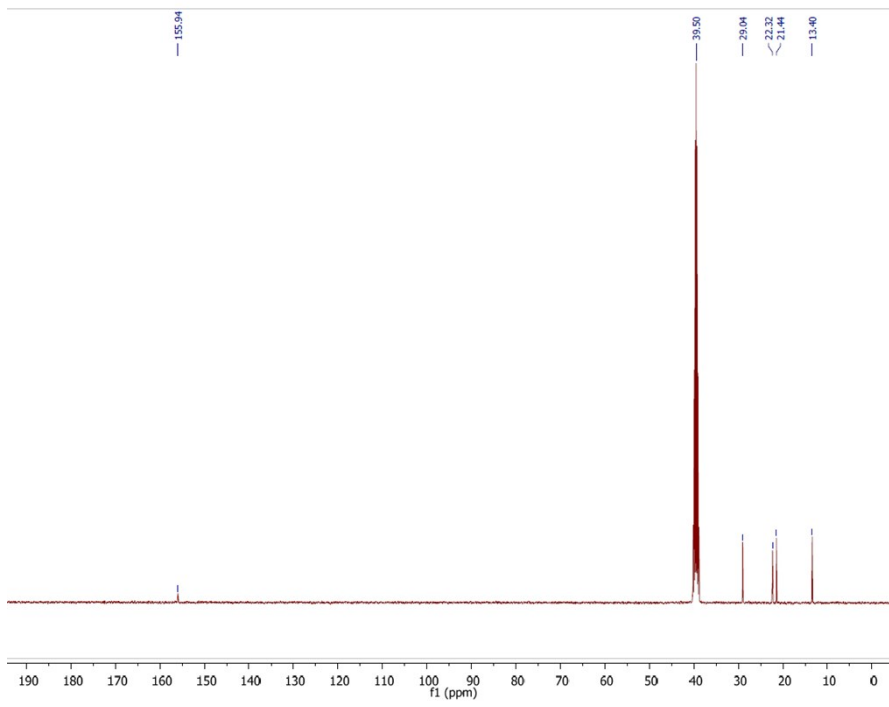

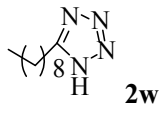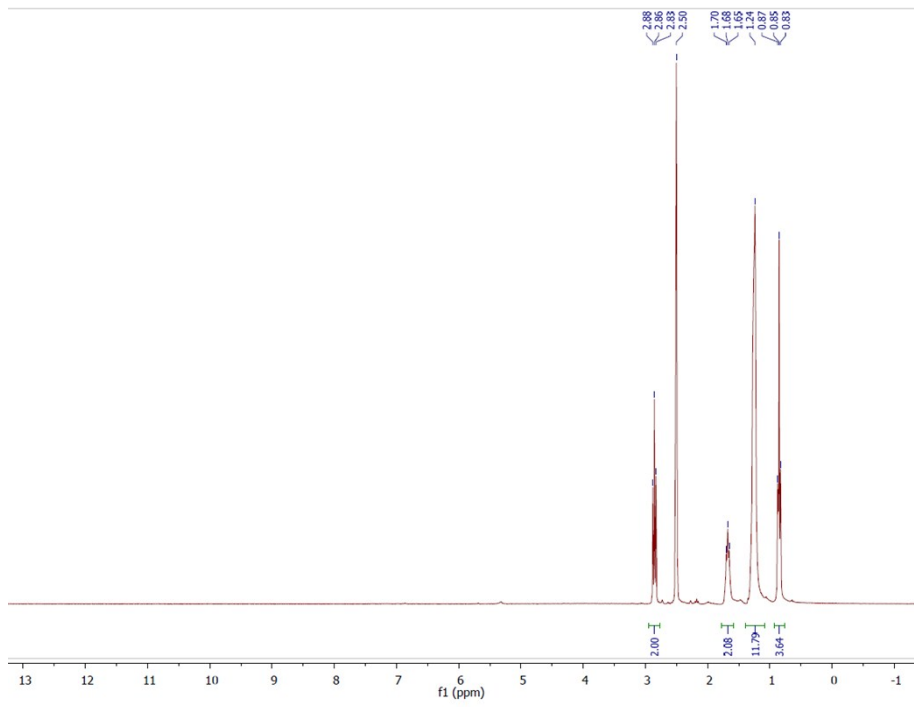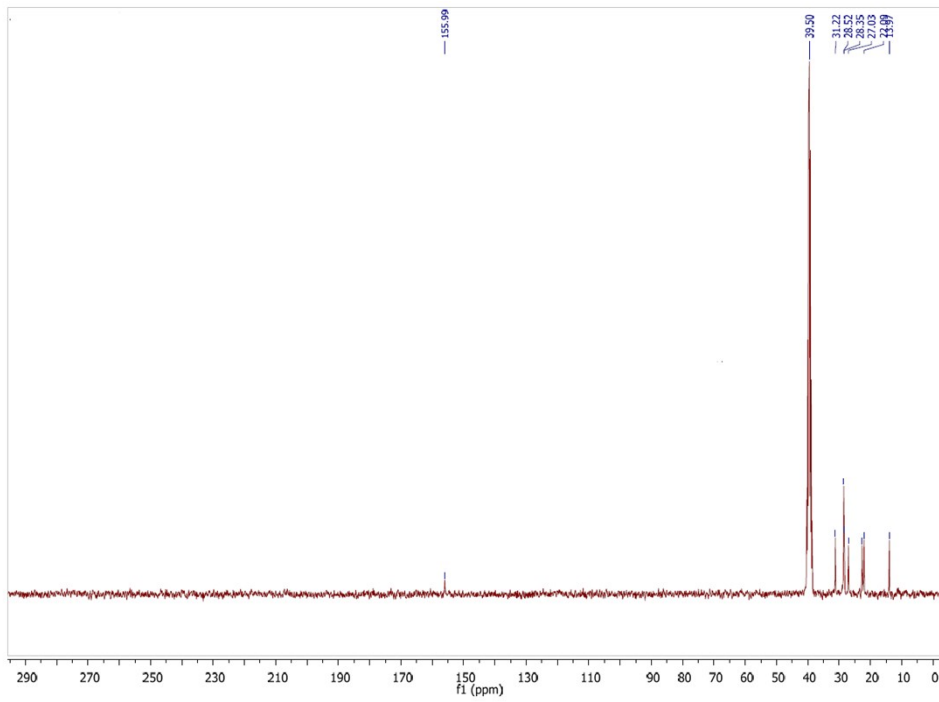

Supplement: c9ra08523h1.pdf [file c9ra08523h1.pdf]
